# Supplementary material for: Experimental priming of independent and interdependent activity does not affect culturally variable psychological processes
Source: R Soc Open Sci. 2017 May 17;4(5):161025. doi: 10.1098/rsos.161025 (PMC5451795; doi:10.1098/rsos.161025)
Supplement: File S1 [file rsos161025supp3.csv]

participant	session	date	activity	meancontribution	meanpunishgiven	meanpunishreceived	pggearnings	pggearnrank	pggearnrelativerank	pggpunishmentgivenrank	pggpunishmentgivenrelativerank	pggpunishreceivedrank	pggpunishreceivedrelativerank	rightchoice	rightchoicerank	rightchoicerelativerank	sortgoodnessofparticipant	goodnessofparticipant	beholcategorisation	afholcategorisation	bepictures	afpictures	besingpronouns	afsingpronouns	beplurpronouns	afplurpronouns	beplursingpronouns	afplursingpronouns	behorizon	afhorizon	beadditems	afadditems	beindvalues	becolvalues	afindvalues	afcolvalues	age	sex	study	year	familiaritywithgroup	country.born	moveukage	parent1m.country.born	parent2f.country.born	grandparentsborn1	grandparentsborn2	grandparentsborn3	grandparentsborn4
1	1	2010-11-03	collective	22.4	0.1	1.4	3.988	25	0.6097561	8	0.19512195	20	0.48780488	NA	NA	NA	0.6097561	51	1	9	3.6	3.2	2	4	6	5	3	1.25	0.576023	0.666667	2	1	0.308252	0.218447	0.400485	0.371359	19	female	Psych	2	all	UK	0	Ethiopia	Ethiopia	Ethiopia	Ethiopia	NA	NA
2	1	2010-11-03	collective	23.4	0.5	0.5	4.092	29	0.70731707	13	0.31707317	12	0.29268293	NA	NA	NA	0.70731707	59	5	7	3.6	1.8	3	1	3	3	1	3	0.646199	0.590643	8	4	0.699029	0.34466	0.449029	0.686893	19	female	Psych	2	all	UK	0	Eden	India	India	India	NA	NA
3	1	2010-11-03	collective	23.1	0.7	0.5	4.1	30	0.73170732	18	0.43902439	13	0.31707317	NA	NA	NA	0.73170732	61	6	6	3.8	4	2	6	3	2	1.5	0.333333	0.625731	NA	NA	NA	0.101942	0.167476	0.152913	0.339806	20	female	Psych	2	all	UK	0	India	India	India	India	NA	NA
4	1	2010-11-03	collective	24.2	1.3	0.2	4.036	27	0.65853659	24	0.58536585	9	0.2195122	NA	NA	NA	0.65853659	55	7	6	4	3.8	2	4	4	3	2	0.75	0.5	0.695906	8	5	0.128641	0.567961	0.25	0.480583	19	female	Psych	2	all	Zambia	18	Zambia	SouthAfrica	Zambia	SouthAfrica	NA	NA
5	2	2010-11-03	collective	17.7	0.5	0.1	4.325	33	0.80487805	12	0.29268293	5	0.12195122	NA	NA	NA	0.80487805	67	2	5	2.4	2.2	5	5	4	3	0.8	0.6	0.657895	0.695906	9	16	0.475728	0.371359	0.441748	0.446602	19	female	Psych	1	all	UK	0	Mauritius	Uk	Mauritius	UK	NA	NA
6	2	2010-11-03	collective	15.7	0.1	0.8	4.355	34	0.82926829	7	0.17073171	16	0.3902439	NA	NA	NA	0.82926829	69	5	8	2.8	3.4	0	2	1	3	1	1.5	0.482456	0.695906	8	9	0.269417	0.616505	0.393204	0.563107	20	female	Psych	1	all	Kosovo	3	Kosovo	Montenegro	Kosovo	Montenegro	NA	NA
7	2	2010-11-03	collective	16	0.3	0.3	4.455	37	0.90243902	10	0.24390244	11	0.26829268	NA	NA	NA	0.90243902	75	4	3	3.6	4	4	5	3	4	0.75	0.8	0.146199	0.695906	1	14	0.283981	0.407767	0.213592	0.492718	21	female	Psych	1	all	HongKong	16	HongKong	HongKong	HongKong	HongKong	NA	NA
8	2	2010-11-03	collective	17.5	0.6	0.3	4.275	31	0.75609756	16	0.3902439	10	0.24390244	NA	NA	NA	0.75609756	63	8	4	2.6	3	4	1	3	4	0.75	4	NA	0.695906	NA	NA	0.468447	0.288835	0.458738	0.441748	18	female	Psych	1	all	Philippines	15	Philippines	Philippines	Philippines	Philippines	NA	NA
9	2	2010-11-03	collective	16.6	0.5	0.5	4.315	32	0.7804878	14	0.34146341	14	0.34146341	NA	NA	NA	0.7804878	65	9	9	3.2	1.8	5	1	2	4	0.4	4	0.745136	0.695906	1	2	0.157767	0.34466	0.206311	0.18932	18	male	Psych	1	all	UK	0	Kenya	Kenya	Kenya	Kenya	NA	NA
10	3	2010-11-04	collective	14.7	5	2.8	2.945	13	0.31707317	35	0.85365854	28	0.68292683	NA	NA	NA	0.31707317	26	7	9	4	4	8	3	3	5	0.375	1.666667	0.681287	0.669591	8	2	0.237864	0.264563	0.356796	0.182039	21	female	Psych	1	all	Germany	14	SriLanka	SriLanka	SriLanka	SriLanka	NA	NA
11	3	2010-11-04	collective	14.8	0.5	3.2	3.275	19	0.46341463	15	0.36585366	31	0.75609756	NA	NA	NA	0.46341463	38	1	4	2.8	3.4	2	4	4	4	2	1	NA	NA	NA	NA	0.131068	0.478155	0.148058	0.349515	19	female	Psych	1	unknowncomputer3	UK	0	SriLanka	SriLanka	SriLanka	SriLanka	NA	NA
12	3	2010-11-04	collective	18.6	5.5	2.7	2.535	6	0.14634146	38	0.92682927	25	0.6097561	NA	NA	NA	0.14634146	12	9	7	2.4	2.6	4	2	4	4	1	2	0.751462	0.894737	1	5	0.43932	0.179612	0.25	0.286408	19	female	Psych	1	all	UK	0	Lebanon	Lebanon	Lebanon	Lebanon	NA	NA
13	3	2010-11-04	collective	15.4	2.1	2.7	2.355	3	0.07317073	28	0.68292683	24	0.58536585	NA	NA	NA	0.07317073	6	5	3	3.4	3.4	3	1	3	8	1	8	0.631579	0.561404	3	5	0.135922	0.453883	0.281553	0.531553	18	female	Psych	1	all	UK	0	Uganda	Uganda	Uganda	Uganda	NA	NA
14	3	2010-11-04	collective	11.6	4.5	6.2	3.195	18	0.43902439	32	0.7804878	39	0.95121951	NA	NA	NA	0.43902439	36	9	9	2.8	2.4	2	2	4	3	2	1.5	0.839181	NA	NA	NA	0.033981	0.565534	0.337379	0.808252	18	male	Psych	1	all	UK	0	NorthCyprus	NorthCyprus	NorthCyprus	NorthCyprus	NA	NA
15	4	2010-11-04	collective	26.3	4.6	4.5	2.632	8	0.19512195	33	0.80487805	37	0.90243902	NA	NA	NA	0.19512195	16	7	7	4	3.4	3	6	5	3	1.666667	0.5	0.704678	0.640351	9	4	0.395631	0.046117	0.509709	0.050971	18	female	Psych	1	all	UK	0	Bangladesh	Bangladesh	Bangladesh	Bangladesh	NA	NA
16	4	2010-11-04	collective	25.7	5.3	4.5	2.624	7	0.17073171	37	0.90243902	36	0.87804878	NA	NA	NA	0.17073171	14	9	8	3.4	2.4	4	8	4	3	1	0.375	NA	0.593567	NA	NA	0.461165	0.257282	0.262136	0.206311	18	female	Psych	1	all	UK	0	Bangladesh	Bangladesh	Bangladesh	Bangladesh	NA	NA
17	4	2010-11-04	collective	22.5	5.2	5.5	2.648	9	0.2195122	36	0.87804878	38	0.92682927	NA	NA	NA	0.2195122	18	3	4	2.8	3.2	2	3	2	4	1	1.333333	0.491228	0.403509	3	3	0.359223	0.412621	0.339806	0.194175	18	female	Psych	1	all	UK	0	Pakistan	Pakistan	India	Pakistan	Yemen	NA
18	4	2010-11-04	collective	20.1	6.6	7.2	2.32	2	0.04878049	39	0.95121951	41	1	NA	NA	NA	0.04878049	4	7	7	2.6	1.8	7	3	0	2	0	0.666667	0.365497	NA	NA	NA	0.548544	0.470874	0.553398	0.504854	18	female	Psych	1	all	UK	0	Mauritius	Mauritius	Mauritius	Mauritius	NA	NA
19	5	2010-11-16	collective	25.7	4.4	2.9	3.192	17	0.41463415	31	0.75609756	29	0.70731707	NA	NA	NA	0.41463415	34	6	4	3.6	2.4	4	4	3	4	0.75	1	0.859649	NA	NA	NA	0.325243	0.395631	0.480583	0.495146	19	female	Psych	1	all	UK	0	Pakistan	Africa	Pakistan	Africa	NA	NA
20	5	2010-11-16	collective	25.2	3.6	3.5	3.152	15	0.36585366	29	0.70731707	33	0.80487805	NA	NA	NA	0.36585366	30	9	9	2.2	2.8	4	5	3	2	0.75	0.4	0.277778	0.22807	0	0	0.223301	0.514563	0.317961	0.366505	18	female	Psych	1	all	UK	0	UK	UK	UK	UK	NA	NA
21	5	2010-11-16	collective	22.3	3.9	6.3	2.688	10	0.24390244	30	0.73170732	40	0.97560976	NA	NA	NA	0.24390244	20	6	2	3	1.8	NA	2	NA	4	NA	NA	0.54386	0.827485	15	13	0.383495	0.385922	0.580097	0.398058	18	female	Psych	1	2 unfamiliar	UK	0	UK	UK	UK	UK	NA	NA
22	5	2010-11-16	collective	24.2	4.9	4.1	2.984	14	0.34146341	34	0.82926829	34	0.82926829	NA	NA	NA	0.34146341	28	6	7	3	3.25	11	3	1	3	0.090909	1	0.181287	0.122807	9	11	0.332524	0.407767	0.259709	0.5	20	female	Psych	1	all	UK	0	Tanzania	India	India	India	NA	NA
23	6	2010-11-17	collective	29	0.1	0.1	4.772	41	1	6	0.14634146	7	0.17073171	NA	NA	NA	1	83	9	9	3.4	3.4	4	5	4	5	1	1	0.505848	NA	NA	NA	0.582524	0.203883	0.128641	0.245146	19	female	English	1	all	UK	0	UK	UK	UK	UK	NA	NA
24	6	2010-11-17	collective	29.6	0.1	0	4.748	40	0.97560976	5	0.12195122	4	0.09756098	NA	NA	NA	0.97560976	81	9	6	2.8	3.2	5	7	2	1	0.4	0.142857	NA	0.760234	NA	NA	0.458738	0.487864	0.101942	0.543689	18	female	English	1	all	UK	0	UK	UK	UK	UK	NA	NA
25	6	2010-11-17	collective	29.5	0	0.1	4.74	39	0.95121951	3	0.07317073	6	0.14634146	NA	NA	NA	0.95121951	79	8	8	3.4	3.2	1	7	5	0	5	0	0.751462	0.853801	9	3	0.082524	0.400485	0.257282	0.262136	18	male	History	1	all	UK	0	UK	Russia	Russia	Australia	UK	NA
26	6	2010-11-17	collective	30	0	0	4.724	38	0.92682927	2	0.04878049	3	0.07317073	NA	NA	NA	0.92682927	77	7	5	1.6	1.6	6	3	4	3	0.666667	1	0.523392	0.535088	3	3	0.199029	0.679612	0.283981	0.601942	19	female	Psych	1	all	UK	0	UK	UK	UK	UK	NA	NA
27	7	2010-11-22	collective	28.4	0.4	3.1	3.564	21	0.51219512	11	0.26829268	30	0.73170732	NA	NA	NA	0.51219512	43	0	0	2.4	2.6	0	1	5	4	5	4	0.520468	0.616959	8	1	0.359223	0.429612	0.441748	0.412621	21	male	Psych	1	all	UK	0	UK	UK	UK	UK	NA	NA
28	7	2010-11-22	collective	25.3	7.9	0.9	3.74	22	0.53658537	41	1	17	0.41463415	NA	NA	NA	0.53658537	45	3	1	2.2	1.8	7	4	2	2	5	0.5	0.687135	0.669591	4	6	0.257282	0.376214	0.199029	0.298544	18	female	Psych	1	all	Netherlands	9	Netherlands	Netherlands	Netherlands	Netherlands	NA	NA
29	7	2010-11-22	collective	26.5	0.9	2.7	3.772	23	0.56097561	21	0.51219512	26	0.63414634	NA	NA	NA	0.56097561	47	7	6	3.4	3.6	3	2	4	5	1.333333	2.5	0.433852	0.492218	2	3	0.555825	0.332524	0.325243	0.259709	21	female	Psych	1	all	Finland	20	Finland	Finland	Finland	Finland	NA	NA
30	7	2010-11-22	collective	25.1	0.7	3.2	3.78	24	0.58536585	20	0.48780488	32	0.7804878	NA	NA	NA	0.58536585	49	8	5	2	2.2	3	1	2	6	0.666667	6	0.766082	0.821637	12	7	0.507282	0.669903	0.18932	0.320388	20	female	Psych	1	all	UK	0	UK	America	Germany	Poland	Hungary	NA
31	8	2010-11-25	collective	27	1.2	1.5	4.068	28	0.68292683	22	0.53658537	21	0.51219512	NA	NA	NA	0.68292683	57	8	4	1.4	2	1	5	4	6	4	1.2	0.47076	0.602339	12	1	0.247573	0.473301	0.211165	0.451456	31	male	PhD animal behaviour	10	all unfamiliar	India	31	India	India	India	India	NA	NA
32	8	2010-11-25	collective	30	0.7	0.9	4.012	26	0.63414634	19	0.46341463	18	0.43902439	NA	NA	NA	0.63414634	53	8	4	2.2	2	0	2	5	4	5	2	NA	0.614035	NA	NA	0.410194	0.514563	0.252427	0.240291	20	male	Psych	1	all unfamiliar	UK	0	UK	UK	India	UK	NA	NA
33	8	2010-11-25	collective	25.4	1.4	0.5	4.42	35	0.85365854	25	0.6097561	15	0.36585366	NA	NA	NA	0.85365854	71	0	3	3.6	3	0	0	0	0	0	0	0.546784	0.576023	5	2	0.252427	0.834951	0.296117	0.473301	38	male	PhD cross modal cognition	10	2 unfamiliar	UK	0	UK	UK	UK	UK	NA	NA
34	8	2010-11-25	collective	24.7	0.6	1	4.42	36	0.87804878	17	0.41463415	19	0.46341463	NA	NA	NA	0.87804878	73	6	4	2.8	3	1	0	2	1	2	1	0.312865	0.178363	9	6	0.432039	0.550971	0.61165	0.451456	24	male	PhD psychology	10	2 unfamiliar	UK	0	UK	UK	UK	UK	NA	NA
35	9	2010-11-29	solitary	NA	NA	NA	NA	NA	NA	NA	NA	NA	NA	32.5	13	0.30232558	0.30232558	25	7	5	3	3.2	1	4	3	0	3	0	0.438596	0.719298	2	3	0.041262	0.487864	0.26699	0.497573	18	female	Psych	1	all	UK	0	India	India	India	India	NA	NA
36	9	2010-11-29	solitary	NA	NA	NA	NA	NA	NA	NA	NA	NA	NA	32.5	14	0.3255814	0.3255814	27	4	7	2.2	2.6	3	2	5	4	1.666667	2	0.745614	0.435673	2	4	0.211165	0.34466	0.220874	0.788835	18	female	Psych	1	all	UK	0	Pakistan	UK	Pakistan	Pakistan	NA	NA
37	9	2010-11-29	solitary	NA	NA	NA	NA	NA	NA	NA	NA	NA	NA	27.5	7	0.1627907	0.1627907	13	7	8	2.4	2	4	1	3	1	0.75	1	0.783626	0.839181	8	9	0.145631	0.359223	0.296117	0.347087	18	female	Psych	1	all	UK	0	Bangladesh	Bangladesh	Bangladesh	Bangladesh	NA	NA
38	10	2010-12-13	solitary	NA	NA	NA	NA	NA	NA	NA	NA	NA	NA	35	18	0.41860465	0.41860465	35	7	9	2.8	2.4	6	2	1	3	0.166667	1.5	0.584795	0.584795	1	2	0.230583	0.417476	0.349515	0.538835	19	female	Psych	1	all	UK	0	Nigeria	Nigeria	Nigeria	Nigeria	Nigeria	Liberia
39	10	2010-12-13	solitary	NA	NA	NA	NA	NA	NA	NA	NA	NA	NA	44.16667	34	0.79069767	0.79069767	66	6	9	2.2	3.6	2	4	3	2	1.5	0.5	0.906433	0.678363	2	2	0.364078	0.342233	0.427184	0.533981	18	female	Bio with Psych	1	all	Nigeria	2	Nigeria	Nigeria	Nigeria	Nigeria	NA	NA
40	10	2010-12-13	solitary	NA	NA	NA	NA	NA	NA	NA	NA	NA	NA	43.33333	33	0.76744186	0.76744186	64	7	9	3	3.2	1	7	4	3	4	0.428571	0.959064	0.959064	6	13	0.276699	0.237864	0.543689	0.68932	18	female	Psych	1	all	UK	0	Ghana	Ghana	Ghana	Ghana	NA	NA
41	10	2010-12-13	solitary	NA	NA	NA	NA	NA	NA	NA	NA	NA	NA	25.83333	2	0.04651163	0.04651163	3	5	5	2.6	2.8	7	5	0	3	0	0.6	0.947368	0.874269	3	14	0.538835	0.449029	0.332524	0.283981	20	female	Bio with Psych	1	all	UK	0	Nigeria	Nigeria	Nigeria	Nigeria	NA	NA
42	11	2010-12-16	solitary	NA	NA	NA	NA	NA	NA	NA	NA	NA	NA	30.83333	11	0.25581395	0.25581395	21	8	7	2.6	3	2	8	3	2	1.5	0.25	0.584795	1	3	6	0.114078	0.305825	0.252427	0.223301	21	male	Medical Genetics	2	all	Nepal	15	Nepal	Nepal	Nepal	Nepal	NA	NA
43	11	2010-12-16	solitary	NA	NA	NA	NA	NA	NA	NA	NA	NA	NA	25.83333	3	0.06976744	0.06976744	5	7	6	3.6	3.6	1	1	5	5	5	5	0.833333	0.80117	3	3	0.478155	0.019417	0.293689	0.169903	19	female	Medical Genetics	2	all	Bahrain	11	India	India	India	India	NA	NA
44	11	2010-12-16	solitary	NA	NA	NA	NA	NA	NA	NA	NA	NA	NA	50	40	0.93023256	0.93023256	78	7	8	3	3.5	5	2	4	6	0.8	3	0.733918	0.684211	9	19	0.441748	0.507282	0.529126	0.502427	19	female	Medical Genetics	2	all	UK	0	India	India	India	India	NA	NA
45	11	2010-12-16	solitary	NA	NA	NA	NA	NA	NA	NA	NA	NA	NA	33.33333	16	0.37209302	0.37209302	31	9	5	1.2	2.2	8	3	3	3	0.375	1	0.552632	0.625731	5	13	0.157767	0.050971	0.123786	0.063107	19	female	Medical Genetics	2	all	UK	0	Egypt	Pakistan	Egypt	Pakistan	India	NA
46	12	2011-02-09	solitary	NA	NA	NA	NA	NA	NA	NA	NA	NA	NA	28.33333	8	0.18604651	0.18604651	15	9	8	2	2.6	3	7	4	1	1.333333	0.142857	0.444444	0.47076	9	6	0.276699	0.347087	0.32767	0.373786	18	female	Psych	1	all	UK	0	Pakistan	UK	Pakistan	Pakistan	Pakistan	India
47	12	2011-02-09	solitary	NA	NA	NA	NA	NA	NA	NA	NA	NA	NA	50.83333	41	0.95348837	0.95348837	80	6	7	3.4	3.4	1	3	2	2	2	0.666667	NA	NA	NA	NA	0.43932	0.563107	0.468447	0.487864	18	female	Psych	1	all	UK	0	Uganda	Tanzania	India	NA	NA	NA
48	12	2011-02-09	solitary	NA	NA	NA	NA	NA	NA	NA	NA	NA	NA	48.33333	39	0.90697674	0.90697674	76	8	7	3.2	3.4	1	1	3	3	3	3	0.581871	0.505848	1	2	0.223301	0.041262	0.25	0.194175	19	male	Psych	1	all	UK	0	HongKong	China	China	NA	NA	NA
49	12	2011-02-09	solitary	NA	NA	NA	NA	NA	NA	NA	NA	NA	NA	30.83333	12	0.27906977	0.27906977	23	8	8	2.2	2	9	10	1	0	0.111111	0	0.75731	0.760234	5	5	0.055825	0.410194	0.213592	0.417476	19	female	Psych	1	all	UK	0	Guyana	Guyana	Guyana	Guyana	Guyana	Portugal
50	13	2011-02-16	solitary	NA	NA	NA	NA	NA	NA	NA	NA	NA	NA	27.5	5	0.11627907	0.11627907	9	7	4	2.6	3	6	3	1	1	0.166667	0.333333	0.75731	0.827485	4	4	0.376214	0.320388	0.473301	0.354369	21	male	Medical Genetics	2	all	Nepal	15	Nepal	Nepal	Nepal	NA	NA	NA
51	13	2011-02-16	solitary	NA	NA	NA	NA	NA	NA	NA	NA	NA	NA	40	28	0.65116279	0.65116279	54	6	6	3.6	3.2	2	5	3	2	1.5	0.4	NA	NA	NA	NA	0.359223	0.51699	0.514563	0.572816	19	female	Medical Genetics	2	all	Bahrain	11	India	India	India	India	India	India
52	13	2011-02-16	solitary	NA	NA	NA	NA	NA	NA	NA	NA	NA	NA	38.33333	23	0.53488372	0.53488372	44	6	6	2.4	3.4	4	3	5	4	1.25	1.333333	0.681287	0.69883	5	4	0.337379	0.371359	0.235437	0.359223	19	female	Medical Genetics	2	all	UK	0	India	India	India	NA	NA	NA
53	14	2011-02-18	solitary	NA	NA	NA	NA	NA	NA	NA	NA	NA	NA	39.16667	26	0.60465116	0.60465116	50	0	0	3.6	3.8	0	7	3	3	3	0.428571	0.619883	0.926901	1	4	0.264563	0.390777	0.371359	0.291262	20	female	Medical Genetics	2	all	Nigeria	11	Nigeria	Nigeria	Nigeria	Cameroon	NA	NA
54	14	2011-02-18	solitary	NA	NA	NA	NA	NA	NA	NA	NA	NA	NA	35	19	0.44186047	0.44186047	37	8	7	2	2.2	4	5	3	3	4	0.6	0.649123	0.769006	2	2	0.410194	0.393204	0.347087	0.453883	20	female	Biology	2	all	UK	0	Saudi Arabia	Bangladesh	Bangladesh	Bangladesh	Bangladesh	Bangladesh
55	14	2011-02-18	solitary	NA	NA	NA	NA	NA	NA	NA	NA	NA	NA	38.33333	24	0.55813953	0.55813953	46	6	4	3.2	2.4	4	2	3	4	5	2	0.666667	0.69883	4	1	0.371359	0.32767	0.458738	0.18932	19	female	Medical Genetics	2	all	UK	0	Mauritius	Mauritius	Mauritius	NA	NA	NA
56	14	2011-02-18	solitary	NA	NA	NA	NA	NA	NA	NA	NA	NA	NA	39.16667	27	0.62790698	0.62790698	52	6	5	3	3	1	4	5	3	6	0.75	0.614035	0.479532	2	3	0.254854	0.65534	0.449029	0.415049	18	female	Medical Genetics	2	all	Oman	17	Oman	Malaysia	Malaysia	Saudi Arabia	NA	NA
57	14	2011-02-18	solitary	NA	NA	NA	NA	NA	NA	NA	NA	NA	NA	45	36	0.8372093	0.8372093	70	8	5	2.8	2.8	3	4	3	3	1	0.75	0.327485	0.356725	10	5	0.257282	0.485437	0.271845	0.308252	20	female	Biomedical Sciences	2	all	UK	0	Bangladesh	Bangladesh	Bangladesh	NA	NA	NA
58	15	2011-02-23	solitary	NA	NA	NA	NA	NA	NA	NA	NA	NA	NA	41.66667	29	0.6744186	0.6744186	56	9	8	3.4	3.6	1	3	0	1	0	0.333333	0.55848	0.707602	7	8	0.262136	0.526699	0.5	0.507282	19	male	Science and Engineering Foundation Program	0	computer 2 unknown	Norway	5	Sri Lanka	Sri Lanka	Sri Lanka	Malaysia	NA	NA
60	15	2011-02-23	solitary	NA	NA	NA	NA	NA	NA	NA	NA	NA	NA	30	10	0.23255814	0.23255814	19	9	9	1.4	2	0	0	0	0	0	0	0.745614	0.80117	NA	NA	0.337379	0.165049	0.371359	0.281553	19	female	Science and Engineering Foundation Program	0	computer 2 unknown	UK	0	Bangladesh	Bangladesh	India	NA	NA	NA
61	16	2011-02-24	solitary	NA	NA	NA	NA	NA	NA	NA	NA	NA	NA	38.33333	25	0.58139535	0.58139535	48	9	7	3.2	3	4	1	3	0	0.75	0	0.187135	0.312865	7	14	0.031553	0.320388	0.429612	0.330097	19	female	Science and Engineering Foundation Program	0	all	UK	0	Pakistan	Pakistan	Pakistan	India	NA	NA
62	16	2011-02-24	solitary	NA	NA	NA	NA	NA	NA	NA	NA	NA	NA	36.66667	21	0.48837209	0.48837209	41	6	5	3	3.4	3	2	3	5	1	2.5	0.622807	0.695906	5	3	0.279126	0.38835	0.274272	0.203883	19	female	Science and Engineering Foundation Program	0	all	UK	0	Kenya	India	India	India	India	India
63	16	2011-02-24	solitary	NA	NA	NA	NA	NA	NA	NA	NA	NA	NA	42.5	31	0.72093023	0.72093023	60	8	5	3.2	3.2	8	5	0	1	0	0.2	0.739766	0.885965	2	5	0.334951	0.478155	0.303398	0.157767	18	female	Science and Engineering Foundation Program	0	all	UK	0	Bangladesh	Bangladesh	Bangladesh	NA	NA	NA
64	16	2011-02-24	solitary	NA	NA	NA	NA	NA	NA	NA	NA	NA	NA	32.5	15	0.34883721	0.34883721	29	9	9	2.8	3.4	2	2	4	5	2	2.5	0.438596	0.695906	4	2	0.262136	0.38835	0.572816	0.208738	18	female	Science and Engineering Foundation Program	0	all	UK	0	Bangladesh	Bangladesh	Bangladesh	NA	NA	NA
65	16	2011-02-24	solitary	NA	NA	NA	NA	NA	NA	NA	NA	NA	NA	42.5	32	0.74418605	0.74418605	62	9	9	3.4	3.4	2	1	1	1	0.5	1	0.473684	0.546784	15	12	0.305825	0.25	0.298544	0.165049	18	male	Science and Engineering Foundation Program	0	all	UK	0	Sri Lanka	Sri Lanka	Sri Lanka	NA	NA	NA
66	17	2011-02-25	solitary	NA	NA	NA	NA	NA	NA	NA	NA	NA	NA	27.5	6	0.13953488	0.13953488	11	8	6	3	3	2	1	4	4	2	4	0.845029	0.853801	5	3	0.546117	0.07767	0.478155	0.356796	20	female	Science and Engineering Foundation Program	0	unknown computer 3	Kazakhstan	20	Kazakhstan	Kazakhstan	Kazakhstan	Kazakhstan	Kazakhstan	Kazakhstan
67	17	2011-02-25	solitary	NA	NA	NA	NA	NA	NA	NA	NA	NA	NA	26.66667	4	0.09302326	0.09302326	7	5	5	2.2	1.8	5	4	3	1	0.6	0.25	0.789474	0.921053	5	5	0.25	0.101942	0.40534	0.419903	19	female	Science and Engineering Foundation Program	0	unknown computer 3	Kazakhstan	18	Kazakhstan	Kazakhstan	Kazakhstan	NA	NA	NA
68	17	2011-02-25	solitary	NA	NA	NA	NA	NA	NA	NA	NA	NA	NA	47.5	37	0.86046512	0.86046512	72	7	5	3.2	2.4	0	2	1	3	1	1.5	0.856725	0.730994	3	5	0.587379	0.533981	0.584951	0.73301	27	female	PostDocEthology	9	unknown computer 1,2,4	France	27	France	Algeria	Algeria	Algeria	France	Belgium
69	17	2011-02-25	solitary	NA	NA	NA	NA	NA	NA	NA	NA	NA	NA	41.66667	30	0.69767442	0.69767442	58	8	8	3.8	3.4	0	4	6	3	2	0.75	0.763158	0.388889	5	2	0.179612	0.264563	0.012136	0.257282	17	male	Science and Engineering Foundation Program	0	unknown computer 3	United Arab Emirates	17	United Arab Emirates	United Arab Emirates	United Arab Emirates	NA	NA	NA
70	18	2011-03-02	collective	4.4	0	0	2.8275	12	0.29268293	1	0.02439024	1	0.02439024	NA	NA	NA	0.29268293	24	7	9	3.8	3.6	3	6	1	4	3	0.666667	0.751462	0.792398	2	10	0.444175	0.381068	0.235437	0.400485	19	female	Biology with Psychology	1	all	UK	0	Bangladesh	Bangladesh	Bangladesh	NA	NA	NA
71	18	2011-03-02	collective	0.2	0	0.2	3.3675	20	0.48780488	4	0.09756098	8	0.19512195	NA	NA	NA	0.48780488	40	0	0	2.6	3.8	5	4	2	3	4	0.75	0.467836	0.602339	5	26	0.259709	0.067961	0.131068	0.67233	18	female	Medical Genetics	1	all	Sri Lanka	5	Sri Lanka	Sri Lanka	Sri Lanka	NA	NA	NA
72	18	2011-03-02	collective	1.9	0.2	0	3.1725	16	0.3902439	9	0.2195122	2	0.04878049	NA	NA	NA	0.3902439	32	8	9	3.2	3.6	6	2	2	5	5	2.5	0.704678	0.681287	2	6	0.322816	0.213592	0.140777	0.412621	19	female	Genetics	1	all	UK	0	Algeria	Algeria	Algeria	NA	NA	NA
73	19	2011-03-02	solitary	NA	NA	NA	NA	NA	NA	NA	NA	NA	NA	25.83333	1	0.02325581	0.02325581	1	6	6	2.5	3.75	3	2	3	3	6	1.5	0.567251	0.608187	18	16	0.40534	0.245146	0.254854	0.461165	19	female	Science and Engineering Foundation Program	0	unknown computer 4	UK	0	Ghana	Ghana	Ghana	Ghana	Ghana	St Helena
74	19	2011-03-02	solitary	NA	NA	NA	NA	NA	NA	NA	NA	NA	NA	48.33333	38	0.88372093	0.88372093	74	8	8	3.8	3.2	4	4	3	4	7	1	0.897661	0.681287	5	1	0.291262	0.412621	0.223301	0.116505	19	female	Science and Engineering Foundation Program	0	all	Lithuania	18	Lithuania	Lithuania	Lithuania	Lithuania	Lithuania	Lithuania
76	19	2011-03-02	solitary	NA	NA	NA	NA	NA	NA	NA	NA	NA	NA	33.33333	17	0.39534884	0.39534884	33	5	8	4	4	5	1	0	5	9	5	0.675439	0.769006	7	14	0.402913	0.293689	0.548544	0.082524	23	female	Medical Genetics	3	unknown computer 3	Romania	20	Romania	Romania	Romania	NA	NA	NA
77	20	2011-03-02	collective	14	1.6	2.5	2.412	4	0.09756098	26	0.63414634	23	0.56097561	NA	NA	NA	0.09756098	8	9	6	3.8	3.8	6	5	3	2	10	0.4	0.421053	0.488304	NA	NA	0.235437	0.531553	0.235437	0.373786	19	female	Science and Engineering Foundation Program	0	all	Netherlands	19	Netherlands	Netherlands	Netherlands	NA	NA	NA
78	20	2011-03-02	collective	12.6	1.6	4.4	2.068	1	0.02439024	27	0.65853659	35	0.85365854	NA	NA	NA	0.02439024	2	2	2	3	3.6	4	4	3	3	11	0.75	0.75731	NA	5	4	0.495146	0.279126	0.359223	0.570388	20	female	Science and Engineering Foundation Program	0	all	Brazil	19	Brazil	Brazil	Brazil	NA	NA	NA
79	20	2011-03-02	collective	12.3	1.2	2.8	2.508	5	0.12195122	23	0.56097561	27	0.65853659	NA	NA	NA	0.12195122	10	7	6	2.8	3.4	4	2	3	6	12	3	0.377193	0.377193	7	15	0.033981	0.783981	0.264563	0.046117	19	female	Science and Engineering Foundation Program	0	all	Turkey	3	Turkey	Turkey	Turkey	NA	NA	NA
80	20	2011-03-02	collective	7.6	6.9	1.6	2.716	11	0.26829268	40	0.97560976	22	0.53658537	NA	NA	NA	0.26829268	22	2	0	2.8	2.8	3	6	4	0	13	0	0.766082	0.631579	NA	NA	0.104369	0.621359	0.237864	0.684466	22	female	Science and Engineering Foundation Program	0	all	Estonia	21	Estonia	Estonia	Estonia	Russia	NA	NA
81	21	2011-03-02	solitary	NA	NA	NA	NA	NA	NA	NA	NA	NA	NA	37.5	22	0.51162791	0.51162791	42	9	8	3.8	3.6	0	2	4	5	14	2.5	0.494152	0.570175	2	5	0.34466	0.359223	0.150485	0.332524	19	male	Science and Engineering Foundation Program	0	all	UK	0	Australia	Australia	Australia	NA	NA	NA
82	21	2011-03-02	solitary	NA	NA	NA	NA	NA	NA	NA	NA	NA	NA	44.16667	35	0.81395349	0.81395349	68	6	6	3.4	2.8	3	4	2	2	15	0.5	0.622807	0.754386	1	12	0.259709	0.395631	0.09466	0.177184	20	female	Science and Engineering Foundation Program	0	all	UK	0	UK	UK	UK	UK	NA	NA
83	21	2011-03-02	solitary	NA	NA	NA	NA	NA	NA	NA	NA	NA	NA	28.33333	9	0.20930233	0.20930233	17	9	9	3.6	3.6	4	5	1	0	16	0	0.535088	0.672515	9	5	0.584951	0.162621	NA	NA	20	female	Science and Engineering Foundation Program	0	all	UK	0	Thailand	Singapore	Thailand	China	Singapore	NA
84	21	2011-03-02	solitary	NA	NA	NA	NA	NA	NA	NA	NA	NA	NA	50.83333	42	0.97674419	0.97674419	82	1	0	4	3.6	6	2	2	4	17	2	0.634503	0.903509	5	11	0.31068	0.524272	0.458738	0.417476	19	male	Science and Engineering Foundation Program	0	all	UK	0	Pakistan	Pakistan	Pakistan	Pakistan	Pakistan	Pakistan
[truncated: 21 more columns]
